# Supplementary material for: Diversification of Bourbon Virus in New York State
Source: MDPI journal article supplement (doi:10.3390/microorganisms11061590), 2023-06-15
Supplement: s1 [file s1]

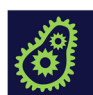

## Supplementary Materials

**Table S1.** Primer sets used for whole genome sequencing of recent Bourbon virus (BRBV) strains from New York State.

| Primer        | Upstream/downstream primer sequence (5'-3') | Target         |
|---------------|---------------------------------------------|----------------|
| BRBV-S6-20    | CGCTTCACAAGAGAAATGGC                        | Segment 6- M   |
| BRBV-S6-868c  | TGTAGAGGTTGTCTCTGATGAT                      | Segment 6- M   |
| BRBV-S5-13    | CAGTTGTTCAACATGCAGTC                        | Segment 5- NP  |
| BRBV-S5-1398c | CAGAGCCAGGCCTATGCCTCG                       | Segment 5- NP  |
| BRBV-S4-12    | GCAGATTGTCCAAAGATGAAT                       | Segment 4- GP  |
| BRBV-S4-1548c | TCTTAATAGACCCGCCTGCA                        | Segment 4- GP  |
| BRBV-S3-13    | CAGTAATTGTCAATCATGGA                        | Segment 3- PA  |
| BRBV-S3-1919c | CTACATATAAACATTTGGCA                        | Segment 3- PA  |
| BRBV-S2-11    | AGCAGTTGTTAACCATGAATCT                      | Segment 2- PB1 |
| BRBV-S2-2152c | ACTAACCCAACCTCTCAACCAG                      | Segment 2- PB1 |
| BRBV-S1-24    | CATACGCACAGATGGAGGGCA                       | Segment 1- PB2 |
| BRBV-S1-1483c | TAGTTGGTGAGTTGCTGCATAC                      | Segment 1- PB2 |
| BRBV-S1-1238  | GACATTCTGTACTACACAGCATC                     | Segment 1- PB2 |
| BRBV-S1-2308c | CTACTTCCAGGAAGGTCCG                         | Segment 1- PB2 |

**Table S2.** Bourbon virus (BRBV) strains used in mutational analysis and phylogenetic trees including New York State BRBV strains, midwestern BRBV strains, and distantly related orthomyxoviruses Batken, Dhori, Oz, and Thogoto viruses.

| Strain Designation | Location            | Year | Source                       | Accession Number                                                             |
|--------------------|---------------------|------|------------------------------|------------------------------------------------------------------------------|
| BRBV NY21-1814     | Suffolk County, NYS | 2021 | <i>A. americanum</i> pool    | OQ513912, OQ513913, OQ513914, OQ513915, OQ513916, OQ513917                   |
| BRBV NY21-2143     | Suffolk County, NYS | 2021 | <i>A. americanum</i> pool    | OQ513918, OQ513919, OQ513920, OQ513921, OQ513922, OQ513923                   |
| BRBV NY21-2666     | Suffolk County, NYS | 2021 | <i>A. americanum</i> pool    | OQ513924, OQ513925, OQ513926, OQ513927, OQ513928, OQ513929                   |
| BRBV Original      | Bourbon County, MO  | 2014 | Human                        | KP657750.3, KP657749.3, KU708255.1, KP657748.2, KU708254.2, KU708253.2       |
| BRBV STL           | St. Louis, MO       | 2017 | Human                        | MK453529.1, MK453528.1, MK453527.1, MK453526.1, MK453525.1, MK453524.1       |
| BRBV MO-2013-2499  | Gentry County, MO   | 2013 | <i>A. americanum</i> pool    | MH880287.1, MH880288.1, MH880289.1, MH880290.1, MH880291.1, MH880292.1       |
| Batken Virus       | Kyrgyzstan          | ?    | <i>Hylamma spp.</i>          | MT628416.1, MT628417.1, MT628418.1, MT628419.1, MT628420.1, MT628421.1       |
| Dhori Virus        | ?                   | ?    | ?                            | NC_034261.1, NC_034263.1, NC_034254.1, NC_034255.1, NC_034262.1, NC_034256.1 |
| Oz Virus           | Ehime, Japan        | 2013 | <i>A. testudinarium</i> pool | NC_040730.1, NC_040731.1, NC_040732.1, NC_040735.1, NC_040733.1, NC_040734.1 |
| Thogoto Virus      | ?                   | ?    | ?                            | NC_006508.1, NC_006495.1, NC_006496.1, NC_006506.1, NC_006507.1, NC_006504.1 |
